# Supplementary material
Source: publisher figshare collection journal article supplement (https://geolsoc.figshare.com/ndownloader/files/13481114)
Supplement: Supplementary file 1 [file 13481114]

## Sheet: Heavy Mineral Geochem (ICP)_UAE
Sample	Al2O3	CaO	Cr2O3	Fe	MgO	SiO2	TiO2	As	Ba	Be	Cd	Ce	Co	Cu	K	La	Mn	Na	Nd	Ni	P	Pb	S	Sr	Y	Zn	Zr
	%	%	%	%	%	%	%	mg/kg	mg/kg	mg/kg	mg/kg	mg/kg	mg/kg	mg/kg	mg/kg	mg/kg	mg/kg	mg/kg	mg/kg	mg/kg	mg/kg	mg/kg	mg/kg	mg/kg	mg/kg	mg/kg	mg/kg
UAE_6153	12.6703	12.5781	4.07165	25.303	5.82982	28.2874	13.635	< DL	438.671	< DL	< DL	315.666	214.626	< DL	< DL	120.672	5558.47	< DL	138.751	132.752	< DL	35.6762	< DL	454.001	135.56	281.857	11978.3
UAE_6154	12.9719	13.6541	2.4627	19.9902	5.916	30.0526	10.9361	< DL	93.773	< DL	< DL	265.687	163.647	41.2274	< DL	87.1396	4305.27	< DL	120.837	105.482	< DL	25.5392	< DL	481.392	126.796	220.82	7802.5
UAE_6155	14.0632	14.8507	2.68185	21.6675	6.28099	32.0027	10.891	< DL	94.1088	< DL	< DL	252.376	173.055	< DL	< DL	83.9347	4642.67	< DL	105.771	100.771	< DL	11.8332	< DL	533.389	126.696	201.257	7478.01
UAE_6156	12.6126	12.9615	3.67532	23.409	6.12456	28.5559	12.3039	< DL	66.6159	< DL	< DL	324.971	194.358	49.8164	< DL	115.327	5016.58	< DL	136.848	132.368	< DL	< DL	< DL	421.417	136.161	272.808	10732.1
UAE_6157	13.5127	14.47	2.37857	20.5076	5.92327	30.8406	10.2355	< DL	95.246	< DL	< DL	296.362	164.236	52.9894	< DL	89.8503	4223.1	4438.88	119.995	117.397	< DL	31.359	< DL	525.361	127.235	204.918	6588.47
UAE_6158	13.0271	13.0893	3.62697	24.2926	5.95656	29.1397	12.9795	< DL	142.741	< DL	< DL	305.955	197.755	80.8222	< DL	102.644	5181.83	< DL	128.358	124.01	< DL	< DL	< DL	486.508	147.518	288.521	10991.7
UAE_6159	12.5954	12.3093	3.41698	22.9526	5.23141	27.0303	13.0512	< DL	72.11	< DL	< DL	281.548	207.706	< DL	< DL	90.2307	5221.3	< DL	101.533	115.671	< DL	16.578	< DL	460.514	145.531	253.789	12630.4
UAE_6160	14.1115	14.597	2.52195	21.0246	6.23892	32.6711	10.5858	< DL	85.604	< DL	< DL	243.859	174.114	97.4763	< DL	84.0009	4571.68	< DL	100.533	110.166	< DL	18.8853	< DL	533.338	124.371	218.644	7858.9
UAE_6161	13.613	13.7387	2.99714	22.092	5.7171	30.4101	11.9219	< DL	73.8682	< DL	< DL	274.518	184.598	< DL	< DL	88.4843	4846.31	< DL	124.929	102.501	2982.16	< DL	< DL	514.344	136.346	200.671	9443.23
UAE_6162	14.2794	14.2811	2.30925	21.8805	5.77975	33.1679	11.0795	< DL	176.075	< DL	< DL	215.146	165.046	142.507	< DL	74.4178	4827.25	< DL	118.724	110.249	< DL	33.0506	< DL	595.669	132.288	270.436	8796.76
UAE_7828	9.32	21.7	2.01	10.73	10.73	26.8	3.681	< DL	150	< DL	< DL	134	99	90	2230	51	2000	4590	46	119	1190	231	1010	998	58	217	2380
UAE_7829	8.62	23.09	1.27	9.02	13.74	24.9	2.911	< DL	129	< DL	< DL	116	77	220	1560	50	1700	4220	< DL	104	1540	43	< DL	495	52	211	1850
UAE_7830	9.71	21.68	2.03	11.41	12.23	25.8	4.405	< DL	114	< DL	< DL	140	107	43	1750	56	2300	3850	53	122	1230	< DL	< DL	556	62	160	2950
UAE_7831	8.44	24.69	1.78	9.86	12.24	23.7	3.236	< DL	94	< DL	< DL	136	86	420	1600	51	1900	3550	< DL	96	784	< DL	< DL	926	53	324	2170
UAE_7832	15.37	19.03	2.56	12.32	10.79	22	4.856	< DL	90	< DL	< DL	310	115	33	1160	132	2400	< DL	97	117	703	< DL	731	514	73	204	3790
UAE_7833	11.33	9.25	3.38	15.6	3.44	23.4	8.457	< DL	4490	< DL	< DL	194	161	6280	2260	72	3600	6080	60	144	< DL	< DL	40200	97100	110	245	7500
UAE_7834	8.14	26.01	2.01	10.4	12.51	21.5	3.476	< DL	97	< DL	< DL	148	85	29	1970	55	2000	6450	< DL	96	1360	< DL	< DL	1130	54	148	2160
UAE_7835	7.36	28.57	1.31	8.14	11.12	21.2	2.33	< DL	120	< DL	< DL	118	76	< DL	2980	43	1500	6220	< DL	79	1460	< DL	< DL	1630	43	129	1250
UAE_7836	7.97	16.46	1.77	10.28	6.57	25.1	3.102	< DL	3380	< DL	< DL	99	96.8379	930.83	1210	28	900	< DL	< DL	56	1680	122.53	17500	43400	61.2648	703.557	1360
UAE_7837	12.51	13.1639	4.37	21.71	7.9	33	7.598	< DL	552	< DL	< DL	358	170	106	< DL	132	4330	< DL	97	179	2020	17	1390	3360	105	284	4880
UAE_7838	12.61	15.75	3.02	16.22	8.52	33.3	5.56	< DL	178	< DL	< DL	241	133	168	2270	98	3100	6100	83	148	2210	< DL	1080	3130	83	290	2610
UAE_7839	11.83	17.4744	2.15	14.95	8.55	34.8	4.007	< DL	521	< DL	< DL	167	106	1690	< DL	67	2670	3680	38	139	2100	< DL	< DL	1540	70	171	1480
UAE_7840	13.4	14.11	4.35	17.83	8.24	33.6	7.4	< DL	95	< DL	< DL	181	175	154	2230	74	3700	5160	65	168	1190	< DL	< DL	555	95	345	5770
UAE_7841	13.01	12.84	4.71	17.76	8.28	32.2	8.075	< DL	83	< DL	< DL	176	182	223	2180	61	3800	4130	52	208	1290	< DL	< DL	591	103	323	6380
UAE_7842	13.46	12.67	5.43	19.36	8.84	34.3	8.836	< DL	164	< DL	< DL	239	196	777	2160	72	4200	3610	74	237	2010	< DL	< DL	1200	105	557	9380
UAE_7843	13.31	15.3	2.88	17.13	7.94	36.5	6.379	< DL	228	< DL	< DL	261	144	54	1920	108	3300	5290	81	139	2740	< DL	1120	2730	98	262	3440
UAE_7844	8.22	14.76	1.76	9.77	4.89	24	3.228	< DL	3320	< DL	< DL	124	81	2080	1840	45	1900	2480	< DL	92	2220	< DL	50700	123300	52	1050	1710
UAE_7847	11.62	12.84	5.8	17.28	12.44	36.5	4.936	< DL	116	< DL	< DL	121	188	30	1810	48	3200	< DL	56	410	626	75	1770	5640	76	327	3530
UAE_7848	13.6	15.59	2.71	16.34	8.04	37.6	5.675	< DL	382	< DL	< DL	214	131	43	1870	91	3200	4780	55	148	2130	< DL	1580	5220	85	259	2470
UAE_7849	14.1016	13.3862	4.51239	18.6711	4.97437	29.0038	12.3256	< DL	52.0079	< DL	< DL	284.936	216.619	< DL	< DL	91.1815	4542.25	< DL	84.6353	130.735	< DL	< DL	< DL	665.968	147.314	248.198	13695.1
UAE_7849a	13.68	15.96	2.07	15.4	8.06	37.5	4.888	< DL	221	< DL	< DL	218	117	80	3040	92	2800	6680	56	135	1420	< DL	< DL	1880	83	202	1820
UAE_7850	15.5	15.43	2.83	17.31	4.65	33.7	11.356	< DL	80	< DL	< DL	285	184	< DL	2140	100	4000	3930	110	112	1650	14	< DL	890	144	262	5930
UAE_7851	13.54	13.33	5.42	18.36	7.85	30.9	10.257	< DL	59	< DL	< DL	185	224	599	1370	75	4100	3540	83	194	896	47	< DL	770	121	638	6640
UAE_7852	12.74	17.34	3.06	16.68	7.46	33.9	5.91	< DL	104	< DL	< DL	222	137	295	1520	100	3300	4300	76	138	2810	368	< DL	1200	90	236	2680
UAE_7853	12.99	14.01	4.15	18.68	7.04	31.4	8.305	< DL	134	< DL	< DL	260	178	83	1560	110	4200	2960	60	143	1140	< DL	< DL	1260	108	271	5270
UAE_7854	14.46	15.4	2.08	18.6	7.28	38	7.738	< DL	122	< DL	< DL	248	150	< DL	2120	92	4200	3760	96	105	< DL	< DL	< DL	795	122	222	5800
UAE_7855	24.21	12.02	2.23	17.65	6.04	30.9	7.658	< DL	72	< DL	< DL	417	144	< DL	2770	170	3900	7670	134	108	2210	< DL	1030	402	119	229	8020
UAE_7856	14.43	14.7	2.12	17.12	6.52	36.5	8.124	< DL	329	< DL	< DL	231	160	< DL	3320	99	4200	7870	104	95	2410	< DL	1400	4640	125	209	5100
UAE_7857	14.35	14.9	1.95	17.15	6.81	36.9	7.597	< DL	285	< DL	< DL	264	143	153	2830	100	4100	6930	92	102	1960	< DL	1000	3470	121	262	4970
UAE_7858	13	14.31	2.64	17.14	3.46	35.3	9.969	< DL	10900	< DL	< DL	115	155.378	474.104	< DL	41	1000	< DL	93	27	1040	< DL	2810	570	151.394	434.263	1420
UAE_7859	14.55	13.74	3.38	19.18	2.32	27	13.275	< DL	4120	< DL	< DL	331	212	2000	1990	113	4600	< DL	108	90	3810	23	14100	35300	158	236	7120
UAE_7860	13.78	13.91	4.04	19.02	3.84	36.2	14.719	< DL	419	< DL	< DL	90	269.608	416.667	< DL	29	1100	< DL	57	22	949	< DL	< DL	732	181.373	553.922	1770
UAE_7861	11.54	12.43	1.24	25.21	3.65	27.6	19.75	< DL	62	< DL	< DL	321	266	27	1940	118	7000	< DL	124	59	1310	< DL	< DL	682	166	171	13600
UAE_7862	13.26	14.01	1.15	18.73	4.57	32	12.746	< DL	67	< DL	< DL	303	186	26	2210	96	4600	2510	108	79	1490	< DL	< DL	824	143	208	6930
UAE_7863	13.45	15.65	0.5	20.71	5.17	35	14.127	< DL	66	< DL	< DL	245	205	71	2960	87	4900	3130	104	56	1570	< DL	< DL	1050	142	164	5090
UAE_7864	11.88	12.55	1.95	23.4	1.89	25.4	21.518	< DL	762	< DL	< DL	426	308	53	1730	157	7500	< DL	125	83	1870	< DL	< DL	965	200	194	15500
UAE_7865	15.57	15.06	2.58	17.79	4.57	34.9	12.321	< DL	243	< DL	< DL	323	201	37	1870	115	4900	2630	117	89	593	64	< DL	885	147	199	6790
UAE_7867	13.84	12.76	3.93	20.9	4.18	29.7	16.322	< DL	190	< DL	< DL	318	242	1120	1400	101	6300	< DL	106	113	1150	45	< DL	784	190	791	15300
UAE_7868	12.66	13.37	2.04	17.05	5.45	33.7	11.668	< DL	155	< DL	< DL	285	199	554	3240	112	4800	4790	134	101	2090	41	< DL	949	141	254	7590
UAE_7870	14.6341	14.3279	2.31501	17.2862	4.48034	34.4775	12.3373	< DL	658.001	< DL	< DL	287.911	185.047	1594.82	< DL	98.9746	4493.35	< DL	110.001	107.971	1672.3	< DL	< DL	2118.24	155.724	154.327	7127.45
UAE_7871	16.69	15.48	1.72	13.88	3.7	39	9.126	< DL	173	< DL	< DL	299	152	491	4590	120	3100	6770	109	99	2390	< DL	< DL	933	137	156	3980
UAE_7873	14.49	14	2.23	17.58	3.58	32.9	11.403	< DL	748	< DL	< DL	307	178	258	4020	117	4200	5610	111	107	1050	42	5300	12000	153	264	8660
UAE_7874	15.44	14.61	2.5	17.53	4.17	34	11.78	< DL	406	< DL	< DL	282	196	46	3000	117	4700	5280	125	109	1620	66	1960	4510	152	249	9610
UAE_7876	14.78	14.88	2.04	17.21	5.06	36	9.441	< DL	147	< DL	< DL	297	153	47	3100	119	3900	5100	136	107	2170	43	866	2740	143	216	6610
UAE_7877	12.7	14.19	2.25	15.13	5.6	34.8	7.338	< DL	475	< DL	< DL	221	139	150	3060	87	3800	7460	75	104	2160	< DL	5640	12100	101	212	5240
UAE_7878	14.59	15.41	2.35	15.73	7.08	36.9	8.319	< DL	175	< DL	< DL	299	156	1680	2810	112	4300	4950	105	128	2580	< DL	< DL	643	129	970	4590
UAE_7879	15.39	13.81	3.27	21.19	4.97	33.7	10.484	< DL	324	< DL	< DL	317	193	< DL	2300	120	4300	4110	99	144	1590	36	< DL	701	146	229	7840
UAE_7880	13.41	13.2	4.01	23.32	2.11	25.4	20.317	< DL	2050	< DL	< DL	410	297	59	1750	158	6400	< DL	166	92	567	< DL	850	1090	223	258	14200
UAE_7881	14.03	13.47	4.57	20.92	5.73	31	11.27	< DL	108	< DL	< DL	266	207	< DL	1250	101	5000	< DL	64	133	1730	25	< DL	678	132	270	8340
UAE_7882	14.36	16.11	4.62	20.1	6.75	33.3	8.492	< DL	190	< DL	< DL	259	181	32	873	106	4700	2770	75	129	1820	< DL	< DL	698	120	265	7630
UAE_7884	16.02	17.34	2.96	18.11	6.31	36.8	7.166	< DL	138	< DL	< DL	198	146	61	2230	97	4200	5670	< DL	114	1440	< DL	852	1180	109	255	4800
UAE_7885	13.24	16.11	3.66	18.57	6.58	33.6	8.277	< DL	262	< DL	< DL	266	170	129	1530	100	4200	4550	69	131	1300	< DL	1590	4480	109	289	6580
UAE_7886	13.4	12.9883	4.22	21.08	5.8	30.5	9.27	< DL	532	< DL	< DL	242	169	104	< DL	83	5070	< DL	52	132	1560	21	< DL	1070	115	265	7220
UAE_7887	14.77	14.68	3.1	18.83	5.45	34.4	9.907	< DL	296	< DL	< DL	276	177	< DL	2270	111	4300	3610	80	112	1920	< DL	< DL	623	141	279	7420
UAE_7888	15.27	16.77	2.95	18.67	6.91	37	7.613	< DL	164	< DL	< DL	230	157	1540	1880	103	4200	4620	87	123	1640	14	< DL	1190	112	306	5490
UAE_7889	12.5735	13.3778	1.75864	22.9949	0.7	36.8698	14.2415	< DL	134.844	< DL	< DL	167.244	254.855	6607.53	< DL	29.2018	1496.82	< DL	94.8109	21.551	< DL	< DL	1238.01	4352.63	170.372	2469.87	2682.66
UAE_7889SS	13.89	15.4763	1.97	17.46	6.7	36.4	6.661	< DL	527	< DL	< DL	230	121	59	< DL	81	3830	3170	90	94	< DL	14	< DL	773	97	160	3980
UAE_7890	13.59	14.9783	2.92	21.09	6.99	35.6	8.541	< DL	485	< DL	< DL	233	159	51	< DL	79	4710	< DL	65	135	< DL	19	< DL	688	112	211	5810
UAE_7891	13.68	15.32	2.7	19.94	7.54	36.5	8.763	< DL	136	< DL	< DL	266	171	2930	2860	106	4200	3470	83	141	2090	< DL	< DL	574	117	262	6070
UAE_7892	14.44	16.56	1.87	17.93	7.64	39.6	7.612	< DL	77	< DL	< DL	248	143	< DL	2590	92	3600	4510	103	113	2230	< DL	< DL	623	113	292	4400
UAE_7893	13.9672	15.3447	2.48724	20.7459	7.66321	36.8598	8.61073	< DL	78.3178	< DL	< DL	240.68	177.22	277.758	< DL	82.2587	4407.04	< DL	86.1734	121.311	1404.43	23.5777	< DL	572.536	120.127	141.855	6384.61
UAE_7894	13.21	14.44	1.49	16.99	6.51	41.3	5.89	< DL	49	< DL	< DL	110	155.844	3320.35	973	39	800	17056.3	66	25	< DL	< DL	< DL	535	125.541	1298.7	1190
UAE_7895	13.29	14.26	3.17	21.29	6.96	35	9.82	< DL	183	< DL	< DL	282	190	4120	2170	98	4600	5650	83	135	887	16	< DL	713	130	443	8030
UAE_7896	14.13	14.8104	1.57	17.04	7.08	37.5	6.627	< DL	483	< DL	< DL	234	117	53	< DL	70	3430	8120	87	100	1690	< DL	< DL	551	98	148	3290
UAE_7897	13.89	14.55	2.7	20.95	7.03	36	9.837	< DL	87	< DL	< DL	280	182	114	2350	103	4500	5850	94	127	1520	< DL	< DL	616	122	279	7460
UAE_7898	15.15	14.8889	1.8	20.42	7.38	40.9	7.828	< DL	529	< DL	< DL	242	136	29	1810	85	4200	4310	70	110	< DL	23	< DL	689	118	210	5420
UAE_7900	13.94	14.49	2.49	20.42	6.82	36.4	9.957	< DL	75	< DL	< DL	237	178	< DL	2810	87	4500	5730	92	112	888	< DL	< DL	570	123	247	7300
UAE_7902	12.62	16.5533	2.03	17.8	8.64	36.7	5.793	< DL	535	< DL	< DL	265	115	123	< DL	88	2850	6870	100	139	2920	17	< DL	596	83	307	1420
UAE_7904	14.04	18.6214	2.82	19.65	9.01	44.6	6.348	< DL	4150	< DL	< DL	714	< DL	< DL	< DL	75	3250	< DL	< DL	140	< DL	< DL	5560	29500	143	111	2530
UAE_7907	5.4	14.6417	1.14	7.29	3.02	15	2.46	< DL	4090	< DL	< DL	541	< DL	< DL	< DL	< DL	939	< DL	763	< DL	< DL	< DL	100300	277600	80	< DL	1390
UAE_7908	12.43	15.6442	2.62	19.03	7.88	35.5	5.203	< DL	512	< DL	< DL	246	117	565	< DL	80	3030	4320	63	133	1860	< DL	7670	21000	79	439	1600
UAE_7911	12.91	12.5825	3.68	18.05	6.24	31.4	6.392	< DL	524	< DL	< DL	215	146	333	< DL	82	3310	< DL	100	173	< DL	< DL	14600	36800	91	252	2800
UAE_7912	13.25	12.4072	3.87	18.13	6.8	32.1	6.514	< DL	535	< DL	< DL	208	144	124	< DL	78	3250	< DL	48	199	< DL	< DL	9370	25500	85	281	2740
UAE_7913	14.53	12.1897	8.55	24.6	6.26	29.4	10.05	< DL	616	< DL	< DL	226	234	140	< DL	88	5240	< DL	76	221	< DL	19	4170	11700	109	433	5270
UAE_7914	12.34	12.8089	4.6	20.18	7.31	31.5	7.164	< DL	564	< DL	< DL	257	162	337	< DL	91	3580	3630	71	166	1630	14	830	2260	99	398	3290
UAE_7917	14.2327	12.8643	6.03517	22.098	6.93762	31.8883	8.16368	< DL	108.062	< DL	< DL	297.794	198.866	3385.97	< DL	102.699	4166.18	< DL	126.177	183.978	< DL	< DL	< DL	715.401	107.701	303.122	4561.01
UAE_7918	14.51	13.9304	4.75	21.14	7.44	34.7	7.556	< DL	527	< DL	< DL	254	164	41	< DL	86	3940	3430	51	180	< DL	19	< DL	1130	98	296	2910
UAE_7919	13.83	13.3222	4.25	19.68	7.35	34.8	6.407	< DL	539	< DL	< DL	187	144	148	< DL	72	3670	3450	53	178	< DL	27	< DL	991	85	263	2200
UAE_7920	13.57	12.0527	6.53	22.58	9.29	33.2	7.857	< DL	545	< DL	< DL	257	202	150	< DL	77	4590	< DL	73	251	< DL	< DL	< DL	794	96	348	5250
UAE_7921	13.23	11.5032	5.62	21.54	8.37	30.8	7.974	< DL	560	< DL	< DL	225	203	50	< DL	75	4470	< DL	57	238	< DL	34	< DL	487	101	324	5710
UAE_7922	13.25	12.8226	4.48	19.51	8.77	34.1	6.833	< DL	568	< DL	< DL	253	159	989	< DL	68	3630	< DL	41	238	< DL	< DL	< DL	537	93	725	3190
UAE_7924	11.39	9.03867	7.36	21.24	6.69	24.4	8.309	< DL	556	< DL	< DL	212	202	173	< DL	53	4260	< DL	40	224	< DL	31	14100	32400	90	430	6680
UAE_7926	13.02	14.6995	4.06	20.41	8.49	36.2	5.833	< DL	573	< DL	< DL	260	144	< DL	1460	89	3400	3360	63	166	2510	< DL	< DL	1410	88	251	1810
UAE_7929	13.24	13.94	4.75	22.95	8.6	32.4	7.643	< DL	94	< DL	< DL	274	195	112	2830	117	3600	5880	109	254	1360	< DL	< DL	492	112	345	3560
UAE_7933	14.9435	11.7367	6.5074	25.1652	4.81336	27.4629	9.05611	< DL	119.34	< DL	< DL	267.374	212.84	197.539	< DL	106.894	4257.59	< DL	100.869	245.731	< DL	48.6441	< DL	670.341	115.574	320.537	3860.58
UAE_7934	14	12.1702	5.25	23.94	5.49	27.8	8.971	< DL	550	< DL	< DL	332	190	667	< DL	108	3860	4710	95	193	< DL	13	< DL	682	107	525	3370
UAE_7935	13.27	14.46	3.92	21.36	8.86	35.5	7.058	< DL	98	< DL	< DL	280	165	94	3250	111	3300	4450	79	248	1900	< DL	< DL	500	107	314	2670
UAE_7936	12.4	9.84	8.24	22.56	12.38	32.5	8.287	< DL	81	< DL	< DL	173	241	99	2180	59	4600	< DL	59	392	1080	< DL	< DL	441	99	439	9190
UAE_7937	12.62	8.39	11.66	26.91	9.47	25.2	12.724	< DL	54	< DL	< DL	221	325	341	1210	68	6000	< DL	56	346	565	15	< DL	329	130	667	14700
UAE_7938	12.5	10.82	7.34	21.42	10.95	31.4	9.63	< DL	82	< DL	< DL	227	235	231	2190	77	4600	4020	77	340	1820	21	< DL	593	114	455	10500
UAE_7939	13.96	13.74	3.97	17.58	10.2	36.8	7.191	< DL	72	< DL	< DL	235	166	241	1610	75	3500	2930	75	275	550	< DL	< DL	509	101	347	4610
UAE_7940	13.48	14.28	4.1	19.44	10.8	36.7	7.787	< DL	72	< DL	< DL	246	180	< DL	2080	89	3800	3140	83	276	1950	< DL	< DL	458	102	265	4820
UAE_7948	12.81	9.58059	7.13	22.8	8.61	26.6	9.755	< DL	544	< DL	< DL	170	240	285	< DL	51	4310	< DL	82	283	< DL	< DL	< DL	408	105	520	7840
UAE_7949	10.68	9.44159	7.65	22.17	13	30	5.97	< DL	592	< DL	< DL	124	206	93	< DL	34	3360	4860	< DL	395	< DL	13	< DL	388	66	438	3930
UAE_7950	12.58	8.88303	6.28	24.47	6.24	25.2	12.205	< DL	561	< DL	< DL	250	241	685	< DL	73	5220	< DL	49	240	< DL	12	< DL	397	128	671	11600
UAE_7951	8.45	7.90429	7	18.75	17.85	33.1	3.241	< DL	632	< DL	< DL	60	183	364	< DL	11	2440	< DL	< DL	491	< DL	< DL	< DL	145	40	409	3070
UAE_7952	9.09	9.11216	5.72	17.35	17.82	37.3	4.2	< DL	570	< DL	< DL	121	160	593	< DL	21	2680	< DL	< DL	406	< DL	< DL	< DL	249	51	384	3380
UAE_7953	12.09	9.07283	7.08	22.56	8.66	26.9	11.623	< DL	527	< DL	< DL	211	253	581	< DL	60	6290	< DL	56	286	< DL	< DL	< DL	404	117	421	9940
UAE_7954	12.45	9.81724	6.04	25.36	5.48	24.9	13.76	< DL	509	< DL	< DL	246	251	192	< DL	88	5610	< DL	114	205	< DL	93	761	712	127	382	8140
UAE_7955	10.52	9.37397	6.3	22.55	11.77	31.1	10.179	< DL	577	< DL	< DL	184	218	116	< DL	68	4710	< DL	< DL	306	< DL	< DL	< DL	593	99	334	9250
UAE_7956	14.21	12.166	4.91	21.59	5.35	29.9	12.007	< DL	516	< DL	< DL	297	204	274	< DL	98	5100	< DL	105	163	1860	< DL	< DL	499	136	395	8660
UAE_7957	14.85	12.9762	5.38	22.5	5.97	31.5	11.712	< DL	573	< DL	< DL	279	210	33	< DL	96	5410	< DL	66	139	< DL	< DL	< DL	602	133	292	8810
UAE_7958	14.34	13.5973	3.3	18.79	6.68	33	8.569	< DL	478	< DL	< DL	242	150	121	< DL	77	4070	< DL	91	135	< DL	< DL	< DL	573	111	257	5020
UAE_7959	14.06	12.8264	4.68	22.92	5.74	31.8	11.203	< DL	510	< DL	< DL	277	198	40	< DL	97	5450	< DL	88	150	< DL	< DL	< DL	725	135	276	9180
UAE_7960	12.83	11.4003	4.01	19.71	5.15	28.1	9.827	< DL	478	< DL	< DL	280	173	117	< DL	86	4460	< DL	99	145	< DL	< DL	< DL	569	120	251	6560
UAE_7961	13.87	11.8439	5.41	23.83	5.83	30.9	11.228	< DL	493	< DL	< DL	292	212	432	< DL	98	5590	< DL	64	163	< DL	14	< DL	518	129	338	8350
UAE_7962	11.3	10.5319	4.17	19.11	8.98	31.8	8.315	< DL	531	< DL	< DL	208	168	711	< DL	71	4170	5170	74	226	< DL	21	< DL	394	98	367	6230
UAE_7963	12.02	9.49376	5.67	23.56	6.11	26.3	13.635	< DL	535	< DL	< DL	260	246	1990	< DL	79	5880	3100	56	183	< DL	< DL	< DL	972	137	359	13600
UAE_7964	14.4	13.6861	4.05	20.56	8.14	35.9	8.382	< DL	536	< DL	< DL	274	162	29	< DL	100	3960	< DL	92	199	< DL	< DL	< DL	731	113	245	4590
UAE_7965	12.23	10.6582	5.46	23.89	6.61	28.7	12.769	< DL	496	< DL	< DL	244	232	< DL	< DL	79	5790	< DL	70	172	< DL	< DL	1960	6130	127	304	13300
UAE_7966	13.32	13.6926	2.83	18.8	8.7	36.8	7.195	< DL	555	< DL	< DL	239	141	< DL	< DL	81	3670	3070	71	175	< DL	< DL	< DL	447	99	198	4520
UAE_7967	12.6	14.4384	2.73	18.22	9.43	35.8	7.348	< DL	517	< DL	< DL	218	129	136	< DL	76	3580	< DL	63	195	< DL	< DL	< DL	449	94	206	3810
UAE_7968	13.06	12.1541	4.99	22.27	7.29	30.5	11.031	< DL	514	< DL	< DL	247	209	190	< DL	77	5250	< DL	71	176	< DL	< DL	845	3630	123	277	10200
UAE_7969	12.04	9.8193	5.53	22.51	6.05	27.1	12.577	< DL	533	< DL	< DL	248	228	52	< DL	74	5540	< DL	41	179	< DL	< DL	< DL	1000	135	294	13300
UAE_7975	14.66	15.55	3.73	19.19	7.18	34.2	10.708	< DL	245	< DL	< DL	286	203	56	2010	112	4400	7340	108	150	814	< DL	< DL	674	138	278	7010
UAE_7976	15.23	15.48	3.79	18.43	6.21	34.1	10.799	< DL	192	< DL	< DL	265	207	< DL	2100	93	4400	5990	88	130	1290	19	2300	6200	135	247	6540
UAE_7977	13.76	16.33	3.25	17.44	7.76	36.4	5.755	< DL	304	< DL	< DL	265	140	389	1890	102	3400	6470	74	143	2830	< DL	2480	6600	94	395	2500
UAE_7979	12.7	17.88	4.68	18.05	7.33	31.6	6.834	< DL	59	< DL	< DL	263	174	340	1880	104	3800	5780	61	150	2360	18	859	625	103	318	3960
UAE_7980	13.43	20.59	5.88	18.21	6.86	30	7.416	< DL	46	< DL	< DL	260	188	341	696	109	4400	3050	77	158	1290	< DL	< DL	790	110	355	5630
UAE_7981	13.61	13.14	5.62	21.01	8.54	33.8	10.596	< DL	136	< DL	< DL	232	227	2490	2150	86	4900	4410	92	225	< DL	14	< DL	893	135	369	9220
UAE_7982	15.32	14.94	4.22	21.28	6.91	34.6	10.309	< DL	300	< DL	< DL	259	217	36	2270	82	4900	3410	80	162	1220	< DL	1410	4610	142	295	7250
UAE_7983	14.51	15.5	2.19	20.23	7.34	38.2	8.574	< DL	66	< DL	< DL	228	169	37	2330	91	4400	3920	104	118	1110	< DL	< DL	753	132	241	6240
UAE_7985	13.16	16.29	3.26	16.85	7.75	35.5	5.596	< DL	614	< DL	< DL	223	143	722	2130	93	3300	8890	60	153	2330	< DL	4120	11400	90	275	2660
UAE_7986	13.43	16.32	3.26	16.98	7.85	36.1	5.952	< DL	612	< DL	< DL	216	143	713	1670	92	3400	7330	56	148	2600	< DL	4420	11500	89	264	2740
UAE_7992	11.62	9.38034	7.22	21.56	13.45	31.3	8.034	< DL	511	< DL	< DL	181	210	584	< DL	44	4300	4940	< DL	346	< DL	16	< DL	364	89	607	7480
UAE_7993	10.66	9.59285	6.51	17.96	13.52	32	6.616	< DL	621	< DL	< DL	152	181	673	< DL	49	3460	4580	52	324	< DL	145	646	508	73	415	4680
UAE_7994	13.42	11.7764	5.46	20.58	9.56	32	8.421	< DL	529	< DL	< DL	189	180	40	< DL	67	3930	3300	57	267	< DL	31	< DL	685	101	321	4720
UAE_7995	11.73	10.8774	5.16	19.06	14.62	38	5.214	< DL	615	< DL	< DL	201	160	64	< DL	48	3380	< DL	46	365	< DL	< DL	< DL	347	73	275	3520
UAE_7996	11.88	11.9167	3.88	17.57	13.11	38.1	5.198	< DL	533	< DL	< DL	198	143	278	< DL	56	3150	< DL	55	322	< DL	< DL	< DL	380	77	349	3040
UAE_7997	11.51	9.46912	6.9	21.7	12.52	31.2	7.598	< DL	585	< DL	< DL	192	217	186	< DL	44	4180	< DL	< DL	360	< DL	< DL	< DL	301	89	382	7890
UAE_7998	11.94	10.8787	6.79	21.52	12.1	32.9	7.892	< DL	528	< DL	< DL	179	205	516	< DL	56	4220	< DL	84	327	< DL	16	< DL	374	92	570	6050
UAE_7999	11.81	10.9877	4.87	19.24	12.05	34.9	6.724	< DL	540	< DL	< DL	203	177	1540	< DL	67	3540	< DL	87	311	< DL	28	< DL	346	86	290	5290
UAE_8000	11.73	11.0784	5.56	19.07	12.75	34.4	6.771	< DL	589	< DL	< DL	170	166	117	< DL	52	3670	< DL	59	317	< DL	< DL	< DL	453	84	308	4940
UAE_8001	11.94	11.385	4.9	18.86	12.51	36	6.557	< DL	540	< DL	< DL	168	157	292	< DL	58	3460	< DL	< DL	307	< DL	394	< DL	450	81	299	3450
UAE_8002	12.36	12.2518	4.46	18.96	12.48	37.3	6.617	< DL	552	< DL	< DL	209	164	175	< DL	56	3770	< DL	36	291	< DL	< DL	< DL	488	91	288	4750
UAE_8003	11.3	9.26899	6.39	22.31	12.45	30.9	8.499	< DL	541	< DL	< DL	175	218	45	< DL	66	4620	< DL	57	320	< DL	< DL	< DL	290	97	355	9050
UAE_8004	10.64	8.85702	6.26	20.63	13.74	31.5	7.732	< DL	595	< DL	< DL	146	197	730	< DL	45	4210	4350	50	362	< DL	< DL	< DL	384	83	547	7390
UAE_8005	11.49	11.6518	4.55	18.71	14.33	37.2	6.29	< DL	557	< DL	< DL	176	153	109	< DL	63	3660	< DL	55	313	< DL	< DL	< DL	1390	82	240	4110
UAE_8006	11.71	11.2197	5.43	20.22	12.51	34.9	7.124	< DL	526	< DL	< DL	167	176	390	< DL	57	3990	< DL	75	284	< DL	< DL	675	2150	92	284	5220
UAE_8007	11.54	10.5055	5.41	19.64	12.59	33	7.697	< DL	528	< DL	< DL	188	188	140	< DL	54	4260	< DL	42	358	< DL	< DL	< DL	448	103	299	7250
UAE_8010	12.66	17.28	3.09	18.02	7.88	34.3	6.08	< DL	1430	< DL	< DL	262	140	244	1930	103	3200	5480	66	141	3160	< DL	9260	24500	94	271	2700
UAE_8011	12.95	17.88	2.7	17.47	8.06	35.5	5.897	< DL	810	< DL	< DL	237	132	67	1570	94	3100	5880	105	135	3520	< DL	11100	27600	92	240	2270
UAE_8012	12.21	12.124	4.97	19.29	6.99	30.8	1.091	< DL	4110	< DL	< DL	731	152	260	< DL	101	3760	< DL	431	146	< DL	< DL	19900	64000	145	218	4590
UAE_8013	12	13.0826	4.29	18.49	7.02	31.9	1.468	< DL	4010	< DL	< DL	945	< DL	< DL	< DL	119	3730	< DL	619	130	< DL	< DL	12100	47800	138	193	4990
UAE_8014	15.02	15.86	2.35	21.13	7.11	37.8	9.248	< DL	82	< DL	< DL	270	170	60	2610	96	4600	4980	78	112	1250	24	< DL	885	140	279	6200
UAE_8015	11.6	12.72	2.04	17.07	5.07	28.8	8.005	< DL	1830	< DL	< DL	212	142	38	2000	82	3800	3410	72	86	1510	< DL	40200	101700	112	191	5540
UAE_8016	13.31	15.57	2.6	18.18	7.4	35.4	7.787	< DL	1320	< DL	< DL	265	149	< DL	2310	101	3700	5090	61	130	2420	< DL	10300	26100	112	218	5470
UAE_8017	11.6787	14.6836	3.00134	15.9681	6.14872	33.1058	6.6187	< DL	782.367	< DL	< DL	143.757	168.879	683.268	< DL	33.7121	1654.68	< DL	82.1149	59.3212	< DL	< DL	10538	30934.9	92.637	357.361	2277.02
UAE_8018	15.13	15.81	1.79	20.12	8.18	39.5	7.205	< DL	122	< DL	< DL	252	151	122	3290	102	3800	6720	80	125	1940	< DL	< DL	734	121	212	4150
UAE_8019	14.59	15.0514	2.42	22.1	7.4	39.7	8.614	< DL	525	< DL	< DL	231	150	99	< DL	83	4780	4200	70	109	< DL	< DL	< DL	1400	121	262	6080
UAE_8020	13.42	16.5	2.6	18.75	7.27	36.7	7.825	< DL	967	< DL	< DL	228	155	157	1990	82	3800	3730	73	120	1650	19	8170	21100	108	252	11000
UAE_8022	14.24	16.04	4.54	21.5	8.1	34.9	8.144	< DL	235	< DL	< DL	266	180	250	1840	121	4400	8140	119	154	3270	< DL	1350	4080	119	421	4080
UAE_8023	13.16	19.33	2.96	18.02	8.27	36	6.265	< DL	358	< DL	< DL	201	143	197	1630	96	3400	6760	73	149	2910	37	< DL	528	98	256	2790
UAE_8024	13.2715	16.4602	3.74152	17.9271	7.69797	35.5203	7.27959	< DL	92.7568	< DL	< DL	287.238	168.259	507.556	< DL	100.728	3808.36	< DL	105.843	138.314	2426.51	< DL	< DL	1879.8	111.305	338.57	4208.78
UAE_8025	13.69	17.5	3.13	18.47	8.32	36.4	6.689	< DL	216	< DL	< DL	300	149	6450	2110	110	3600	5360	83	162	2640	14	909	2140	107	319	3000
UAE_8029	8.46	9.17664	1.64	14.04	4.87	24.8	5.705	< DL	495	< DL	< DL	182	105	446	< DL	50	3030	3240	42	79	< DL	< DL	54300	131400	84	329	5160
UAE_8030	8.72	9.95	1.46	21.34	4.79	26.1	11.572	< DL	2030	< DL	< DL	290	176	1110	2000	102	4700	3440	115	72	1790	< DL	40300	100800	140	294	10000
UAE_8031	14.33	14.15	2.93	21.75	2.66	28	15.196	< DL	1150	< DL	< DL	340	234	498	1220	128	5400	< DL	132	125	1950	< DL	6950	18000	195	450	9490
UAE_8032	13.67	14.82	1.83	22.34	3.31	31.1	16.124	< DL	91	< DL	< DL	355	226	2440	2910	126	5600	2450	137	82	2040	41	< DL	987	180	281	10500
UAE_8033	12.7275	12.5875	1.45378	26.8406	0.5	36.4687	18.2627	< DL	45.5979	< DL	< DL	149.334	296.335	596.268	< DL	33.1613	1907.65	< DL	97.9251	26.7292	< DL	< DL	< DL	860.744	195.167	309.451	3577.9
UAE_8035	9.64	11.7414	1.62	21.66	6.61	33.2	10.303	< DL	411	< DL	< DL	101	176.334	487.239	< DL	23	2100	< DL	56	41	< DL	< DL	3920	9180	106.729	285.383	3760
UAE_8036	13.19	12.6393	3.16	20.04	6.1	34.1	10.961	< DL	510	< DL	< DL	264	177	198	< DL	97	5670	< DL	90	110	< DL	< DL	2510	6240	141	299	7580
UAE_8037	13.91	13.0395	3.34	20.02	6.14	32.9	9.98	< DL	479	< DL	< DL	301	173	96	< DL	98	5340	< DL	112	98	< DL	< DL	2090	6880	136	266	7640
UAE_8040	13.26	13.4082	2.23	21.23	6.86	35.3	8.434	< DL	511	< DL	< DL	234	149	< DL	< DL	85	4660	< DL	80	102	< DL	< DL	< DL	2780	123	235	6610
UAE_8041	14.02	15.0581	1.66	20.56	7.77	38.5	7.049	< DL	505	< DL	< DL	223	123	41	< DL	76	3960	3180	84	107	2490	19	< DL	611	115	213	3900
UAE_8042	13.64	14.0047	1.83	19.69	6.98	37.3	7.181	< DL	446	< DL	< DL	242	122	84	< DL	78	4140	< DL	84	103	< DL	< DL	947	3820	112	217	4950
UAE_8043	13.94	14.2645	1.86	19.49	7.06	37.7	7.89	< DL	506	< DL	< DL	226	135	37	< DL	84	4260	< DL	66	80	< DL	< DL	< DL	1870	113	211	5270
UAE_8044	13.11	13.1891	3.66	20.98	5.47	29.7	13.884	< DL	513	< DL	< DL	272	219	49	< DL	103	4990	< DL	85	119	1380	< DL	< DL	671	148	269	7870
UAE_8045	13.79	13.2253	3.45	20.56	5.48	31.5	13.081	< DL	512	< DL	< DL	309	202	< DL	< DL	110	5680	< DL	77	111	< DL	14	< DL	938	157	280	10500
UAE_8500	13.43	14.099	2.72	23.27	6.55	34.7	11.053	< DL	482	< DL	< DL	230	174	82	< DL	72	5330	< DL	77	109	< DL	12	< DL	660	128	245	8830
UAE_8501	13.85	8.79229	2.01	29.76	2.95	20.1	26.223	< DL	419	< DL	< DL	386	320	< DL	< DL	118	9050	< DL	106	57	< DL	35	< DL	441	186	229	20700
UAE_8502	15.25	15.9934	1.37	16.41	5.48	38	9.004	< DL	462	< DL	< DL	257	133	119	1550	87	3520	< DL	75	87	< DL	< DL	< DL	893	125	239	3500
UAE_8503	11.92	11.77	2.69	22.83	4.94	29.2	17.699	< DL	482	< DL	< DL	313	251	118	< DL	103	6950	< DL	91	99	< DL	41	< DL	690	167	277	14700
UAE_8504	13.51	13.8229	2.1	17.9	5.53	34.3	12.074	< DL	480	< DL	< DL	299	173	33	< DL	105	4570	< DL	136	89	1720	38	< DL	801	155	229	7740
UAE_8505	15.91	13.9519	6.13	22.48	4.04	28.7	15.443	< DL	527	< DL	< DL	274	259	46	< DL	87	5830	< DL	106	134	< DL	13	< DL	824	141	371	9300
UAE_8506	12.94	10.5237	6.82	24.06	3.23	20.5	21.552	< DL	510	< DL	< DL	356	338	137	< DL	107	7540	< DL	115	136	< DL	< DL	< DL	1030	175	479	14100
UAE_8507	12.47	12.1434	4.21	24.52	2.87	24.6	22.353	< DL	426	< DL	< DL	389	319	90	< DL	148	8330	< DL	134	104	< DL	12	< DL	864	208	318	16100
UAE_8508	11.6	15.8204	4.87	21.21	7.07	27.5	8.509	< DL	537	< DL	< DL	299	180	298	< DL	103	4540	< DL	69	149	< DL	< DL	4490	14600	104	467	4780
UAE_8509	12.7	14.7051	4.47	21.75	7.32	30.2	7.882	< DL	571	< DL	< DL	661	172	777	< DL	454	4670	5690	469	154	1590	34	< DL	702	440	363	4230
UAE_8511	11.17	12.6414	4.72	19.67	6.76	27.1	7.003	< DL	519	< DL	< DL	245	154	59	< DL	91	3840	< DL	58	130	1520	54	20700	53700	89	267	4470
UAE_8512	11.49	12.2732	4.57	18.77	6.8	28.2	6.791	< DL	544	< DL	< DL	238	149	305	< DL	78	3750	< DL	61	145	1340	< DL	23800	62000	88	282	3830
UAE_8513	11.71	13.629	4.03	18.49	7.03	29.6	7.593	< DL	573	< DL	< DL	225	151	98	< DL	77	3780	3040	74	127	1430	< DL	17000	45200	90	250	4270
UAE_8515	11.75	15.8767	4.21	20.86	7.45	31.6	5.747	< DL	548	< DL	< DL	241	134	142	< DL	84	3500	< DL	65	151	2410	< DL	7760	21900	79	272	2520
